# Supplementary material
Source: ML conference proceedings conference paper supplement (https://openreview.net/forum?id=QN0PplUVdt)

# DCMN Causal Knowledge Graph Evolution

CAUSES    ENABLES    MODIFIES

## Simple Task: "Pick up red block" 8 Causal Relationships

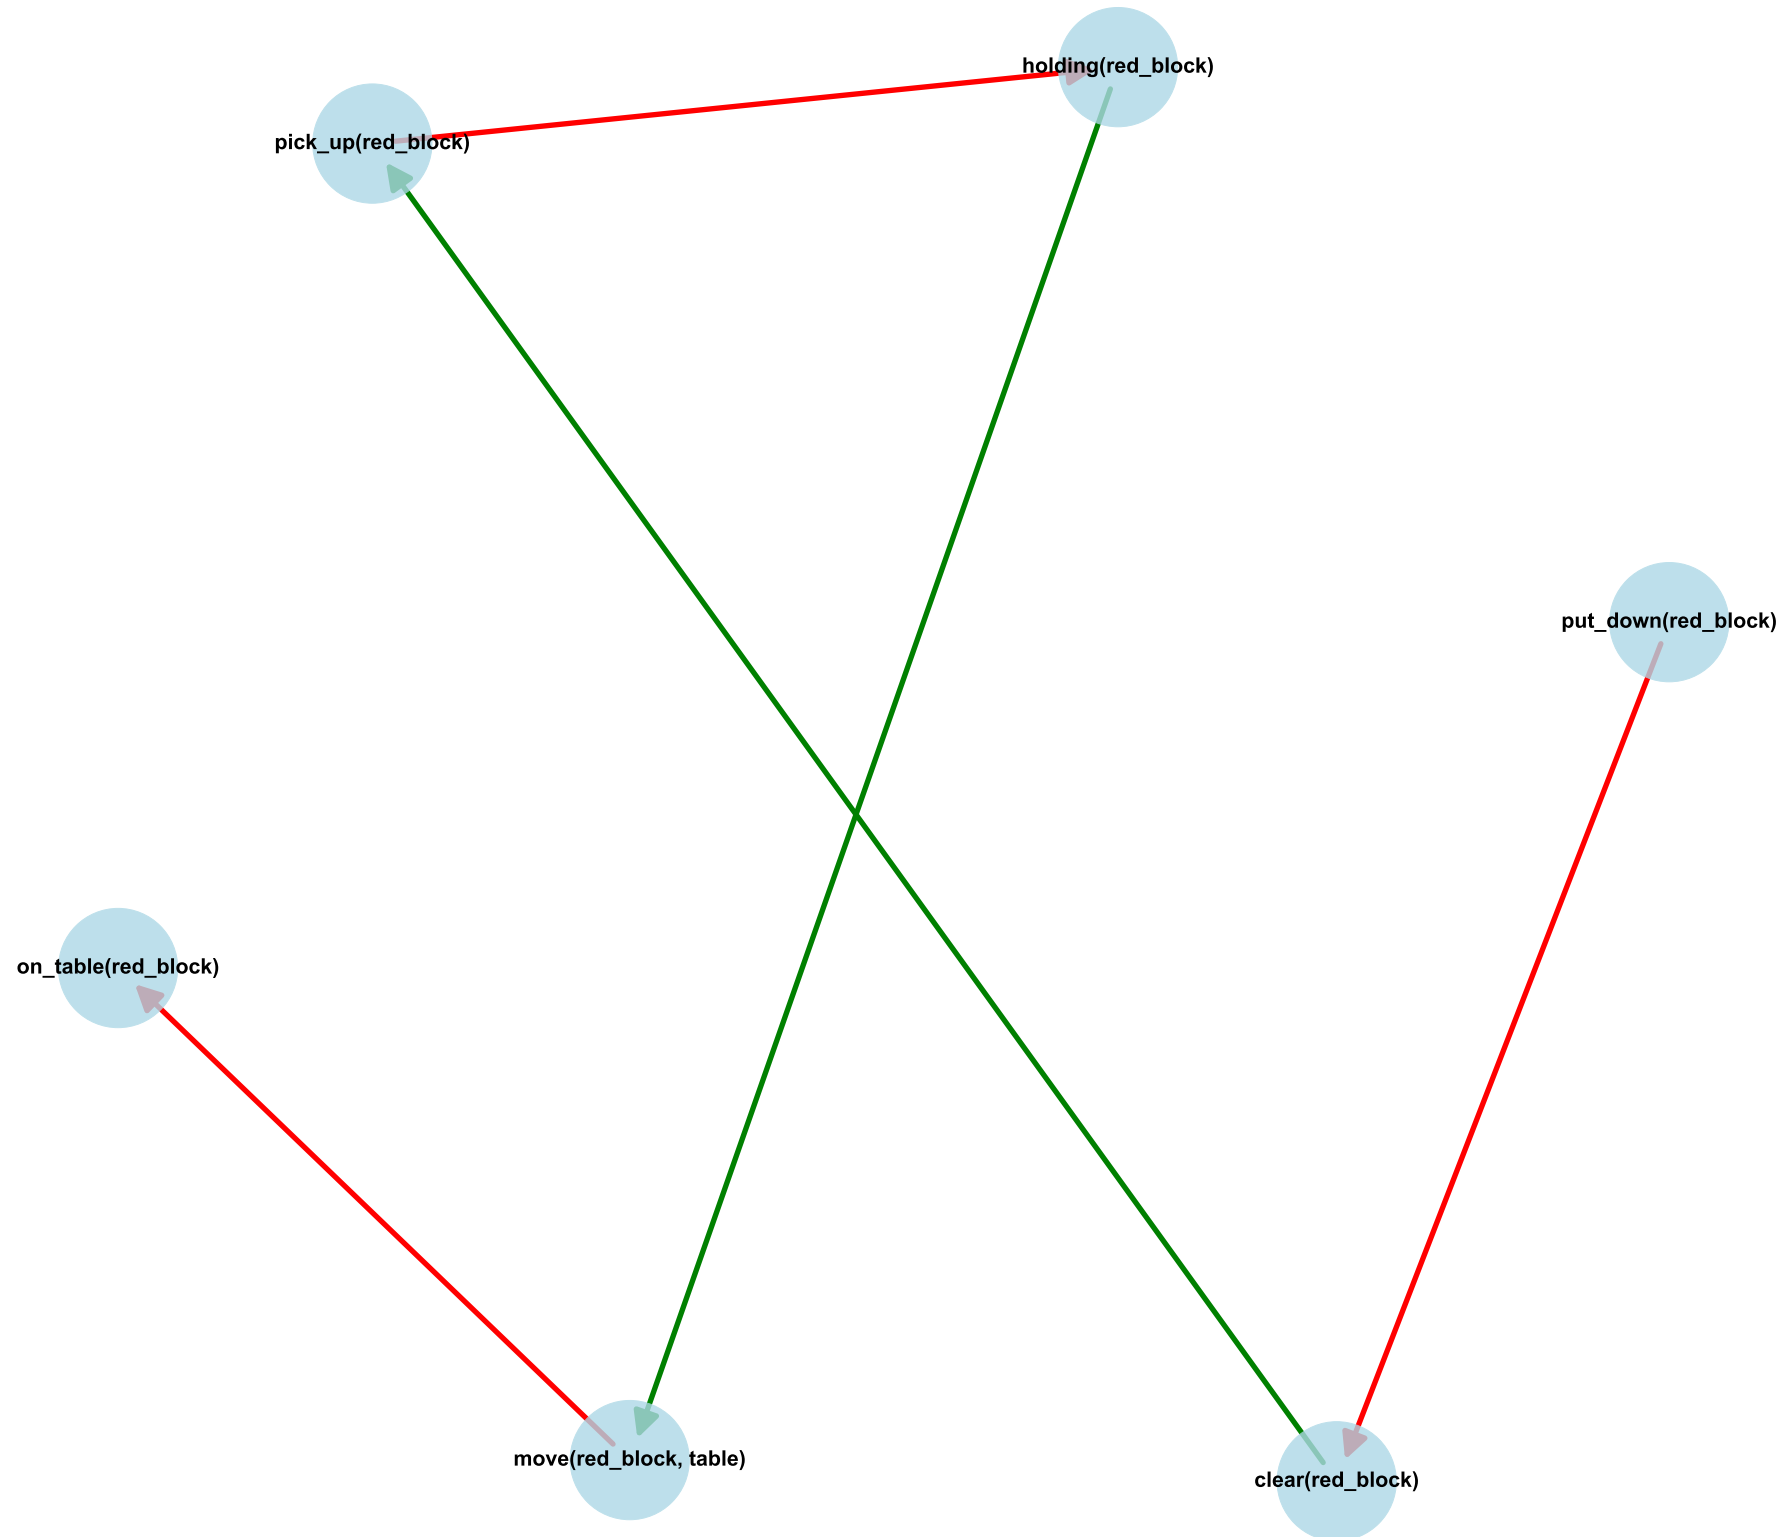

## Complex Task: "Dinner Party Planning" 47 Causal Relationships

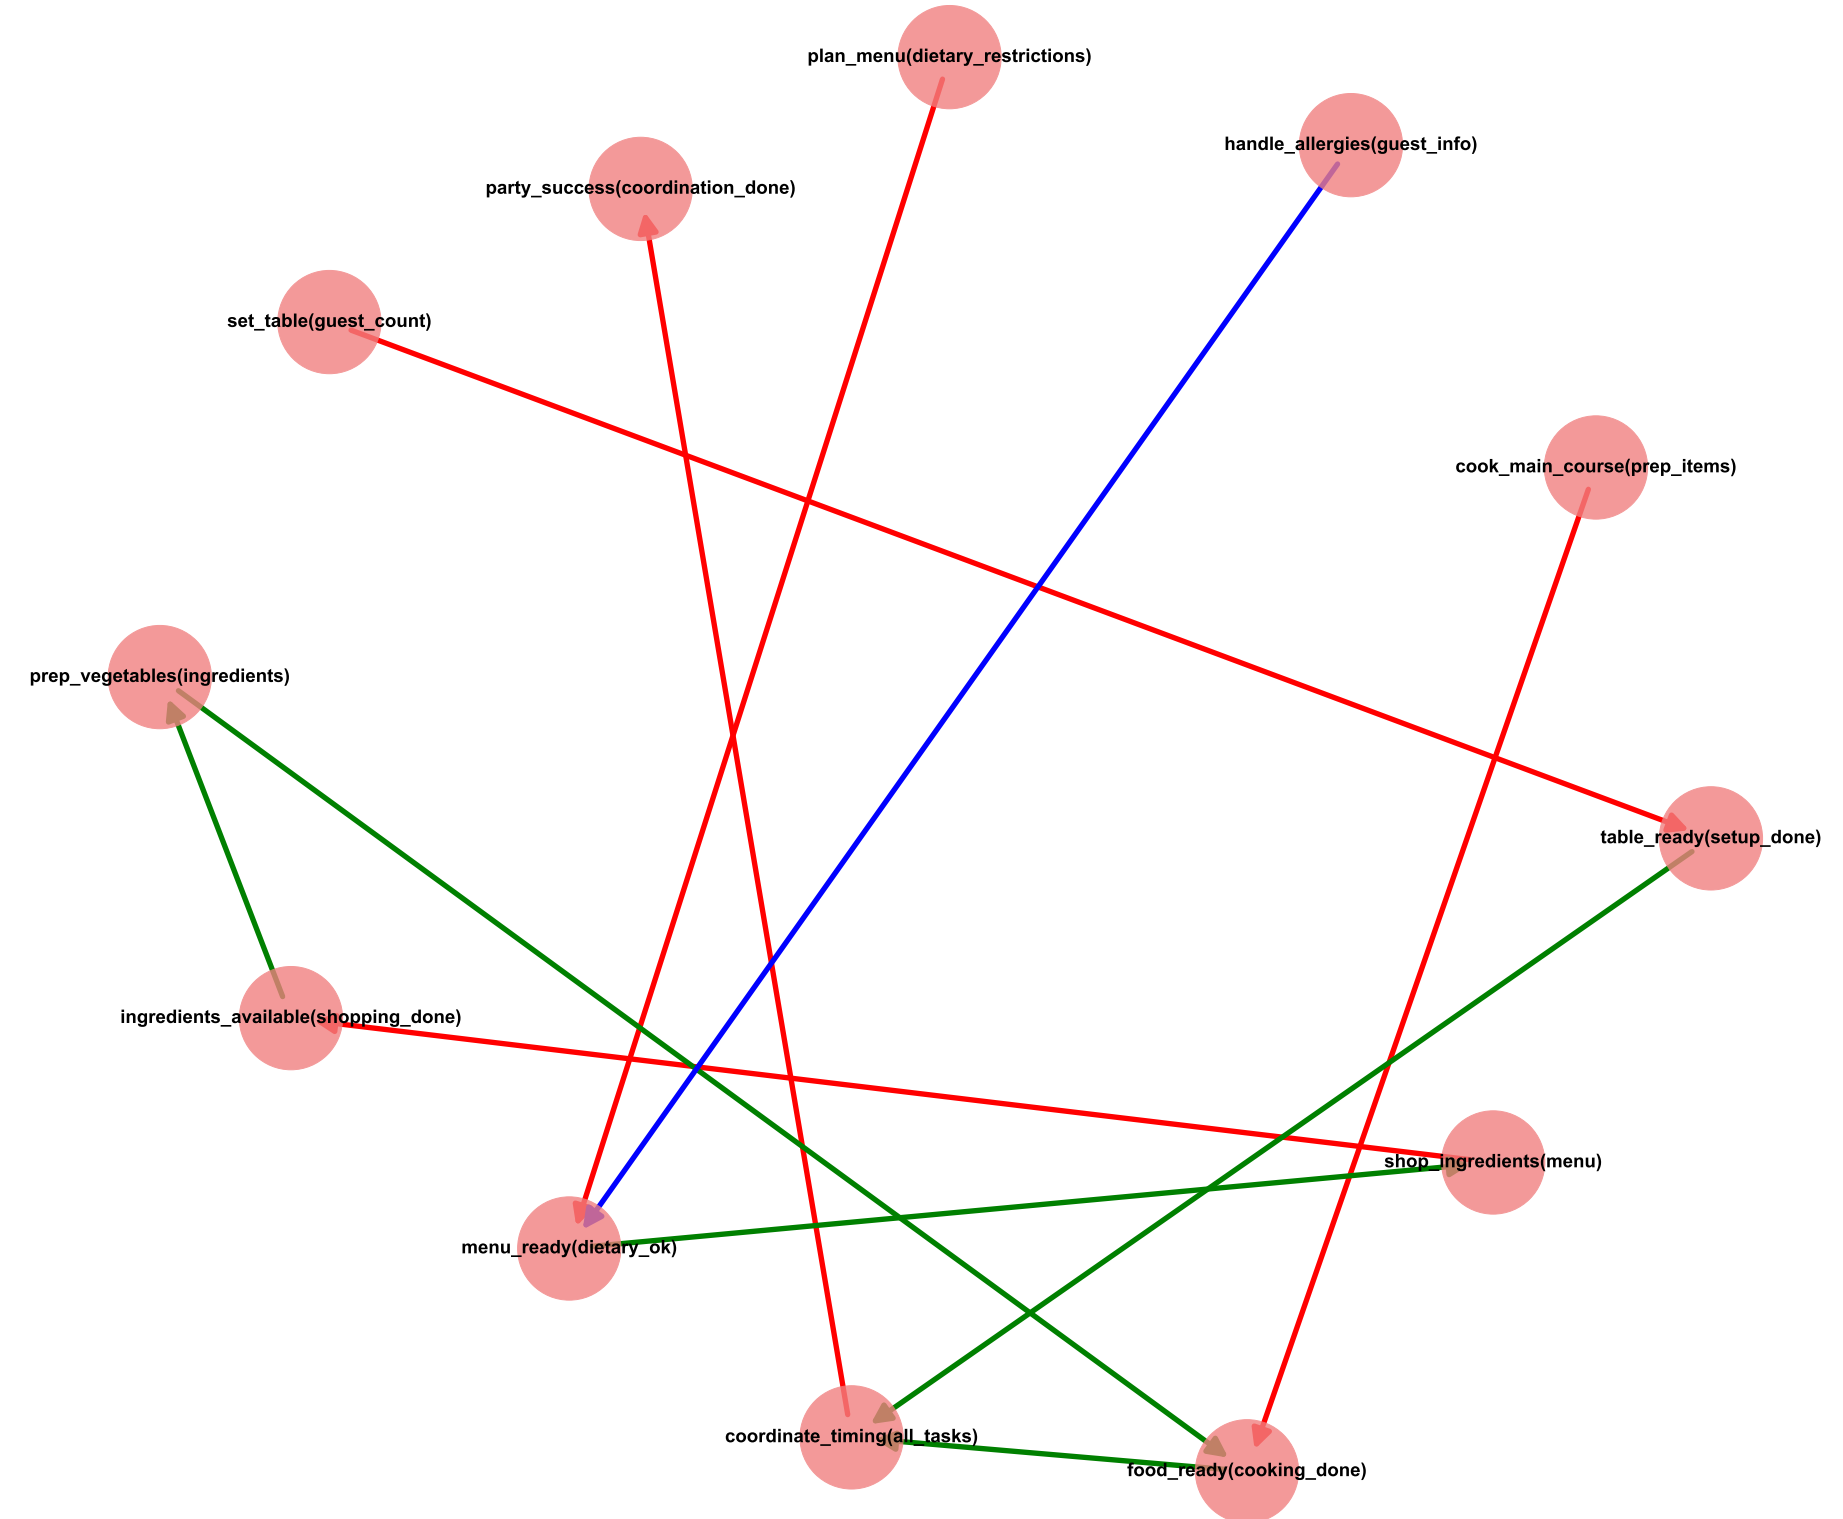

Supplement: supplementary_material [file dcmn_causal_knowledge_graphs.pdf › research_paper_materials/figures/dcmn_causal_knowledge_graphs.pdf]
