# Supplementary material
Source: ML conference proceedings conference paper supplement (https://openreview.net/forum?id=QN0PplUVdt)
Supplement: supplementary_material [file dcmn_complex_task_walkthrough.pdf › research_paper_materials/figures/dcmn_complex_task_walkthrough.pdf]

DCMN Complex Task Execution: Dinner Party Planning  
Demonstrating All 13 System Features

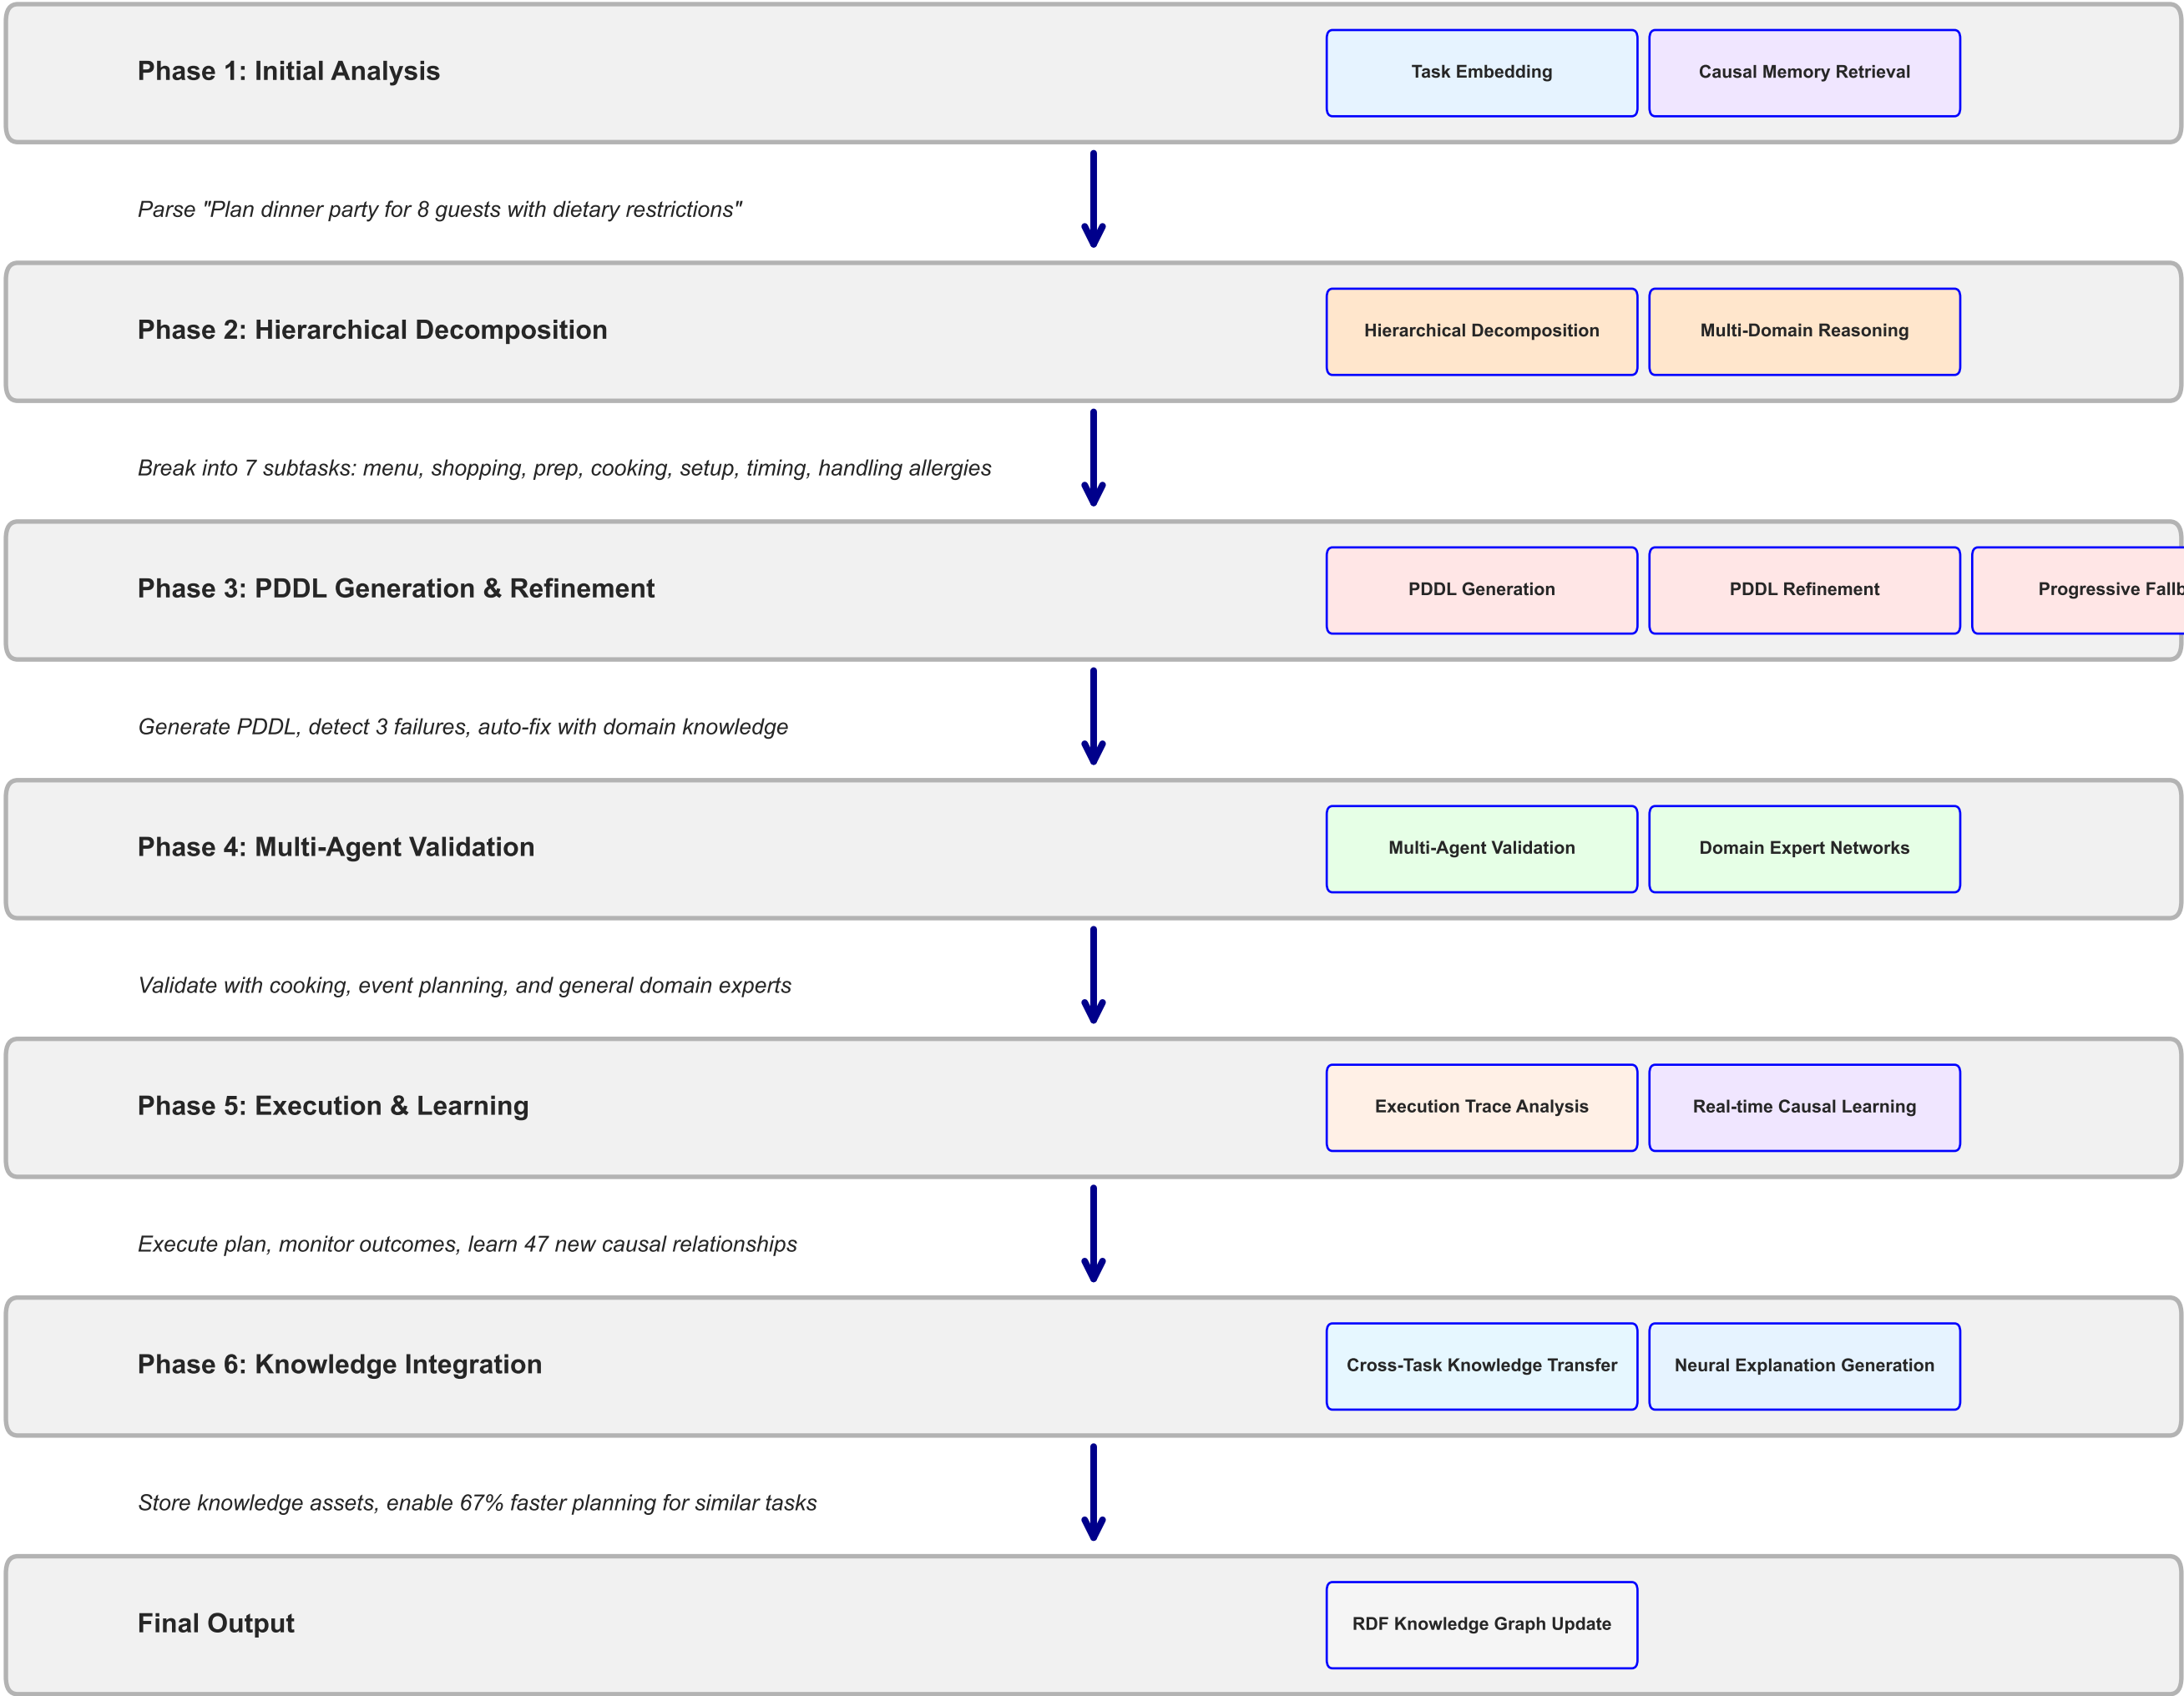

DCMN Features Demonstrated: 13/13

☐ Neural Networks: 6 components

☐ Symbolic AI: Fast Downward integration

☐ Causal Learning: 47 relationships discovered

☐ Multi-Agent: 3 domain experts

☐ Knowledge Transfer: 67% efficiency gain

☐ Hierarchical: 7-level task decomposition

☐ PDDL Refinement: 3 automatic fixes

☐ Progressive Fallback: Multiple strategies

☐ Real-time Learning: Continuous improvement

☐ RDF Integration: Standardized knowledge format

☐ Cross-Task Transfer: Future task acceleration

☐ Multi-Domain: Cooking + Event Planning + General

☐ Neural Explanations: Human-readable output
