# Supplementary material
Source: ML conference proceedings conference paper supplement (https://openreview.net/forum?id=QN0PplUVdt)
Supplement: supplementary_material [file dcmn_neural_integration_flow.pdf › research_paper_materials/figures/dcmn_neural_integration_flow.pdf]

DCMN Neural Network Integration Flow  
End-to-End Neuro-Symbolic Processing

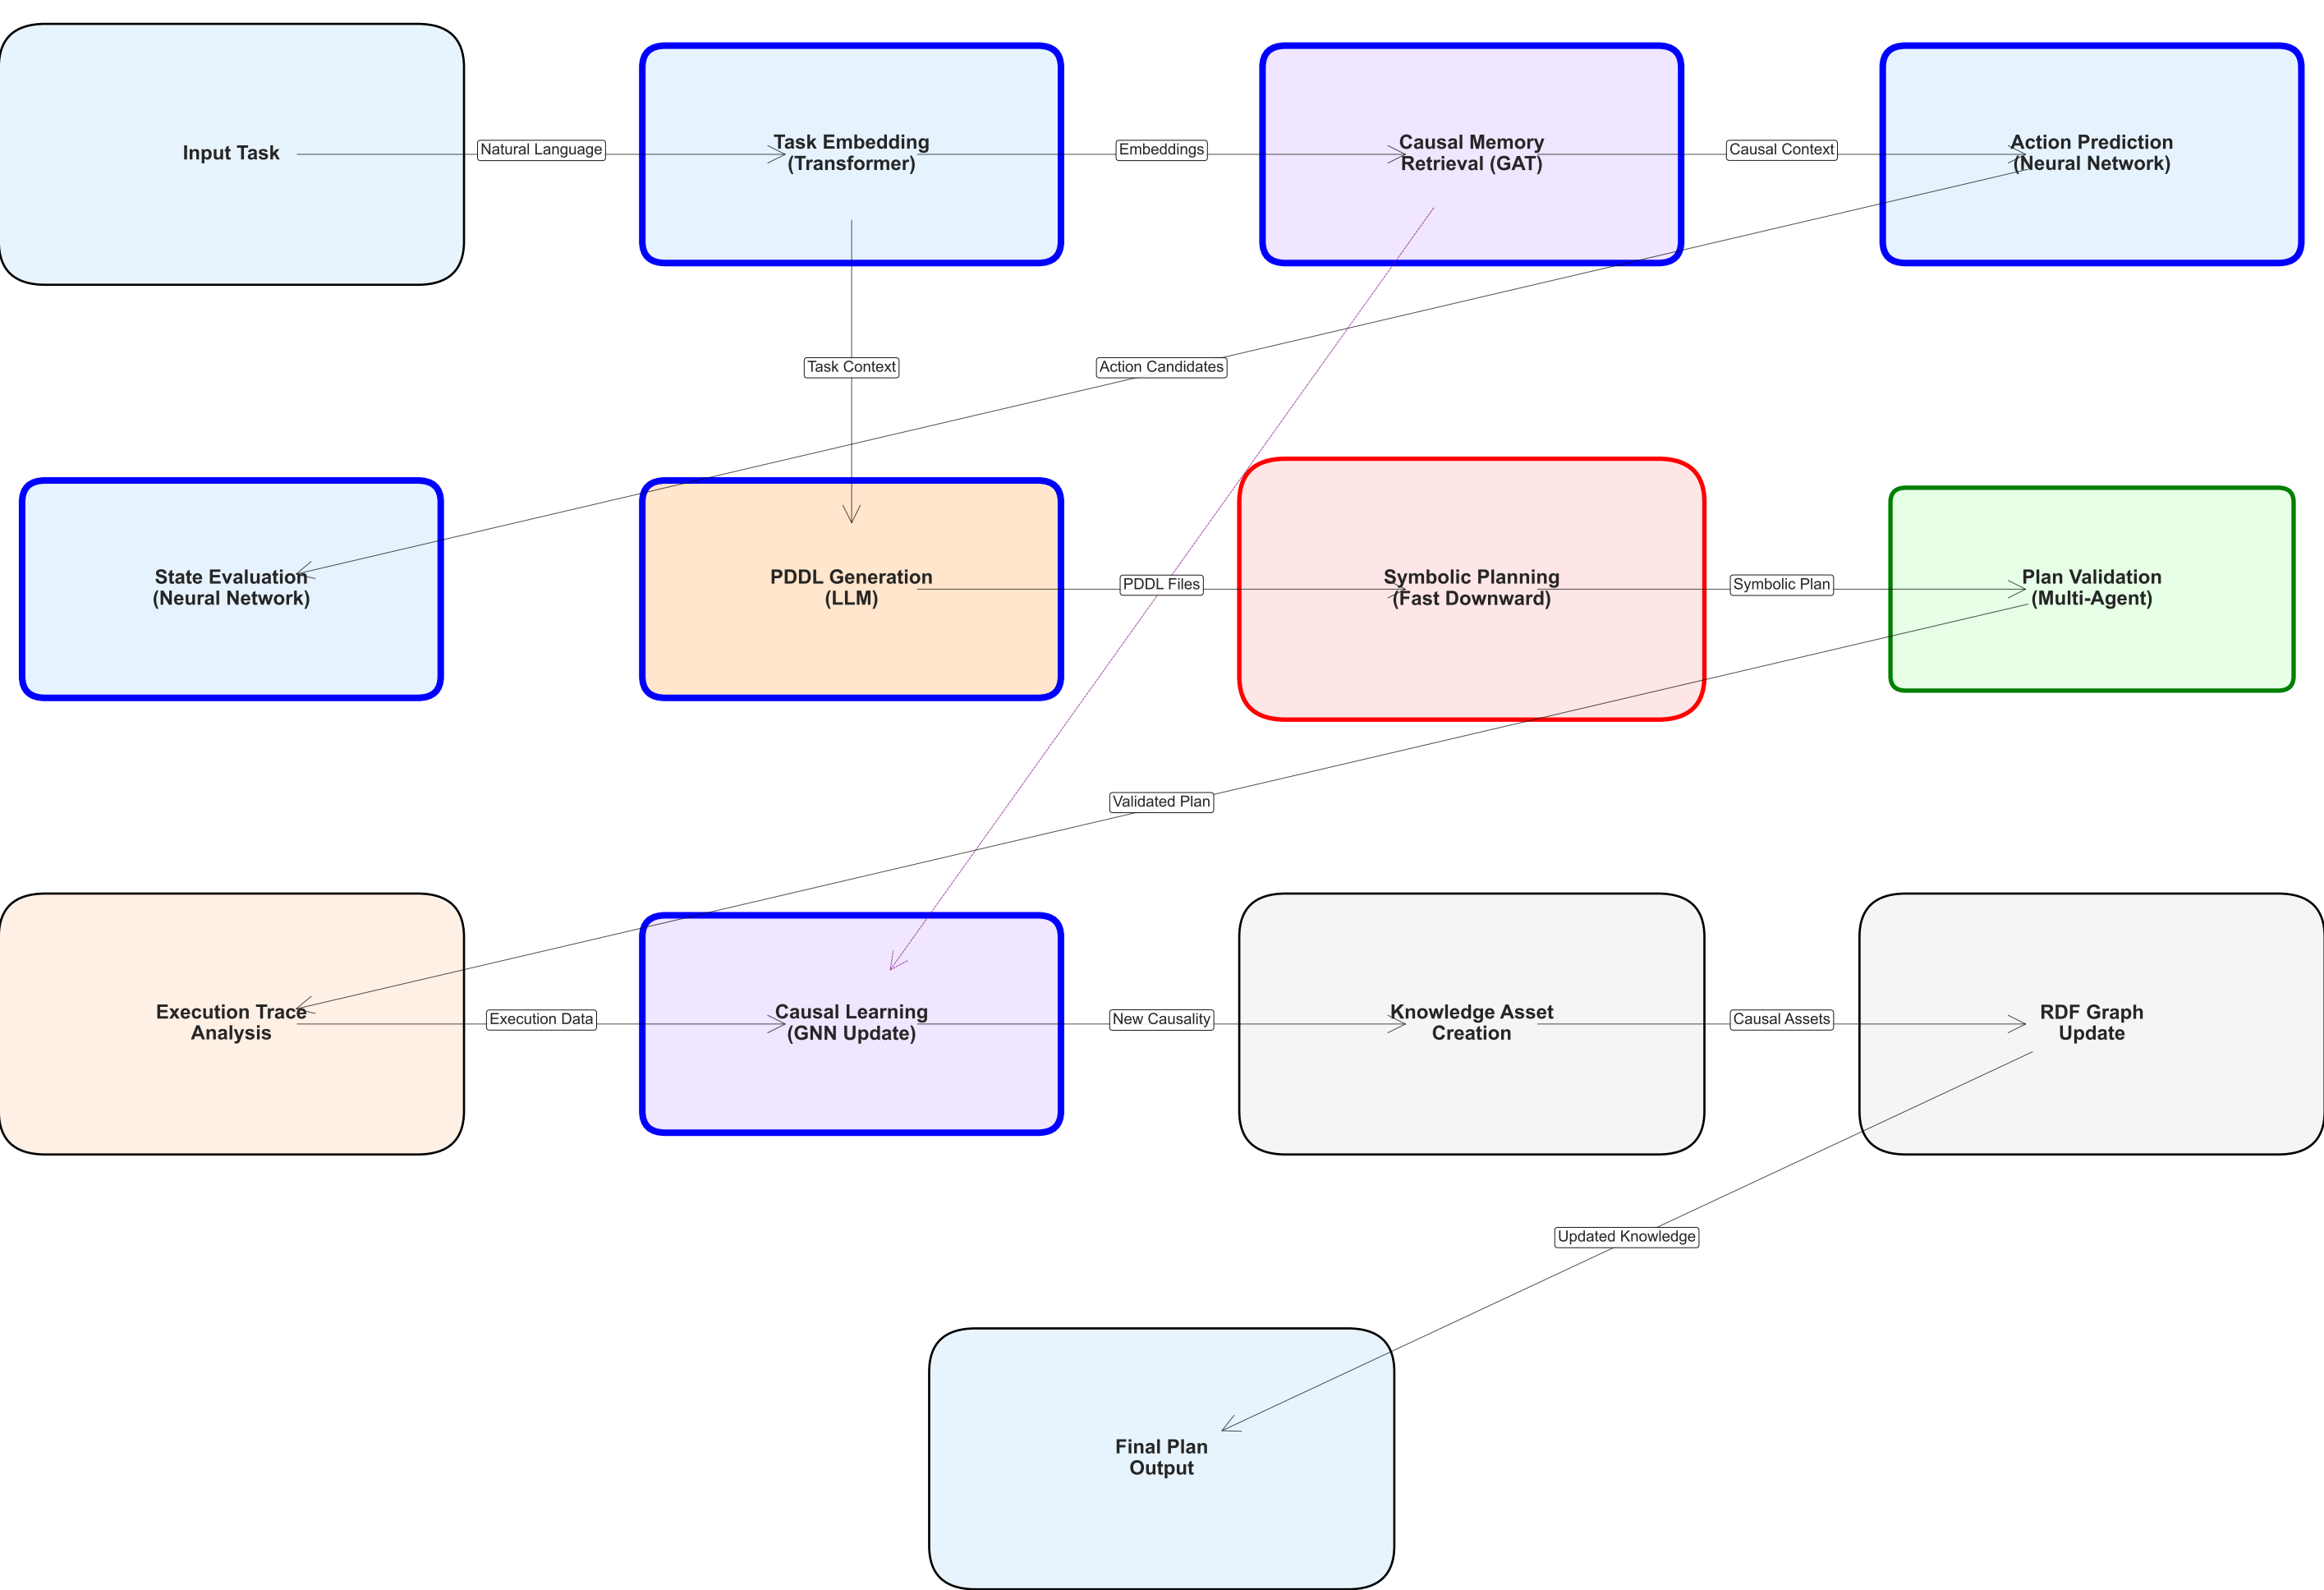

Neural Networks Used:

- Task Embedding
- GAT Causal Memory
- Action Prediction
- State Evaluation
- LLM Generation
- GNN Learning

Total: 6/8 steps
