# Supplementary material
Source: ML conference proceedings conference paper supplement (https://openreview.net/forum?id=QN0PplUVdt)

# DCMN System Architecture

## Neuro-Symbolic Integration with Causal Learning

- Neural Networks
- DCMN Components
- Symbolic AI
- Validation Systems

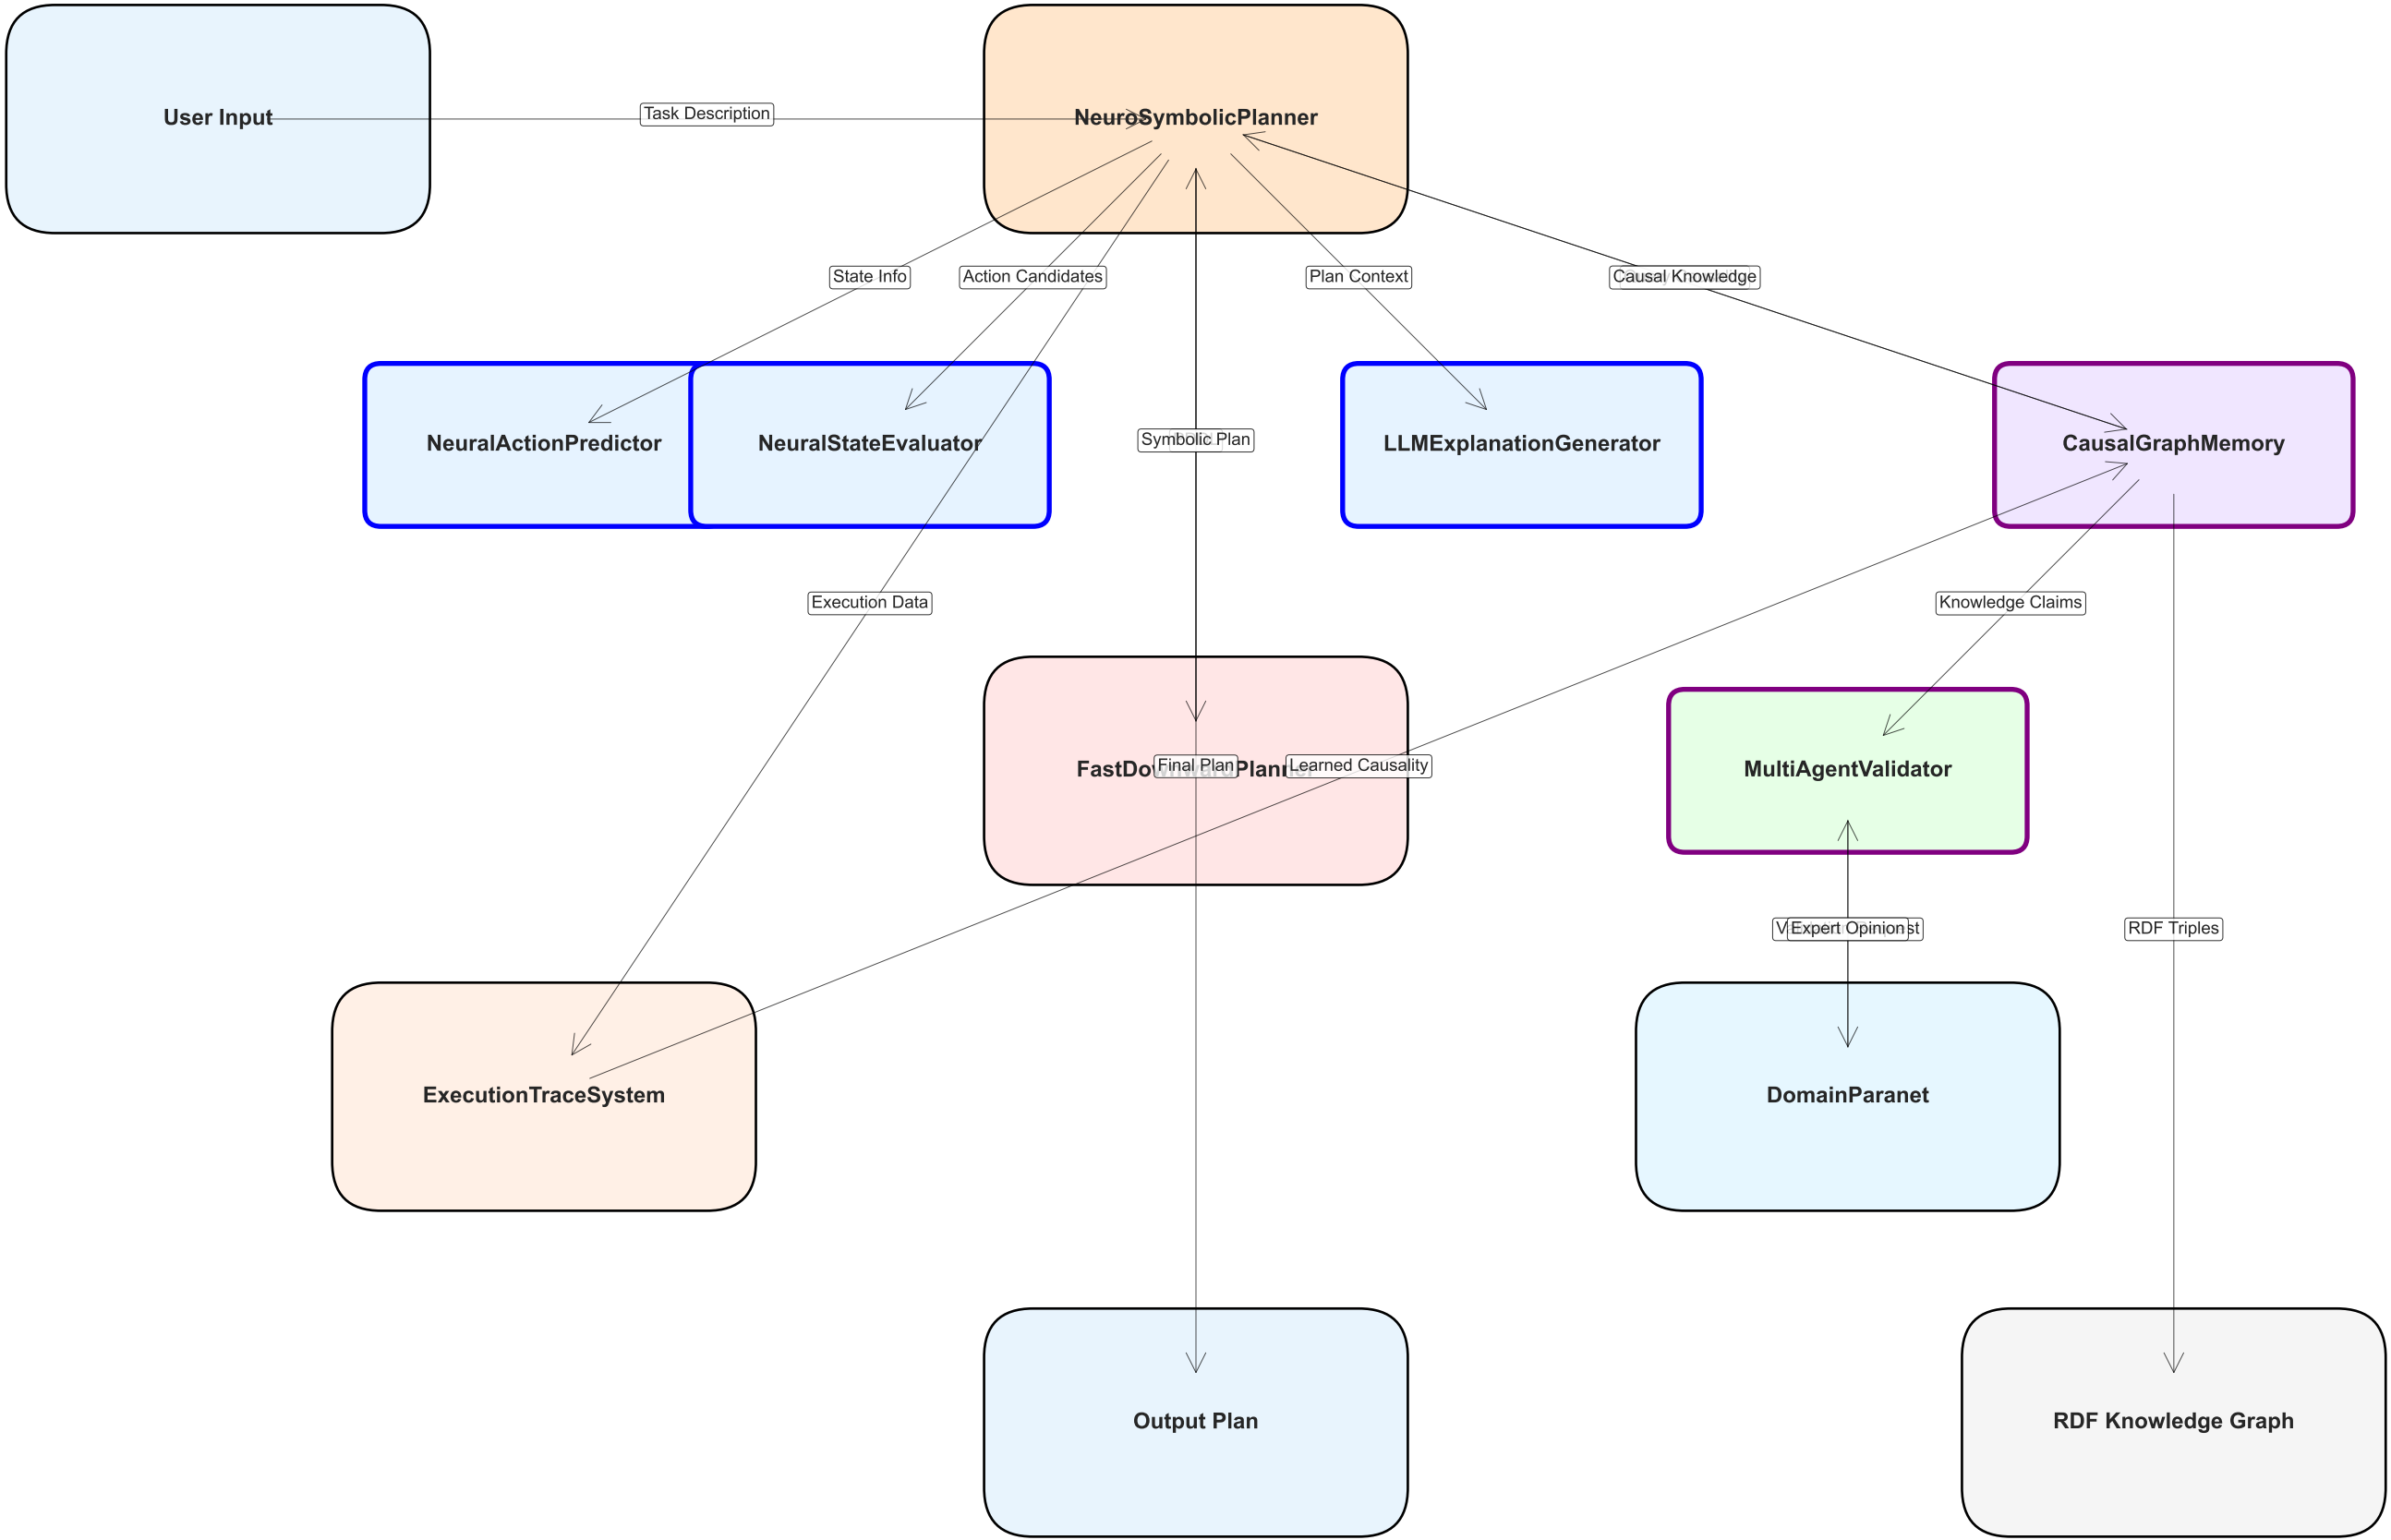

Supplement: supplementary_material [file dcmn_system_architecture.pdf › research_paper_materials/figures/dcmn_system_architecture.pdf]
