# Supplementary material
Source: ML conference proceedings conference paper supplement (https://openreview.net/forum?id=QN0PplUVdt)

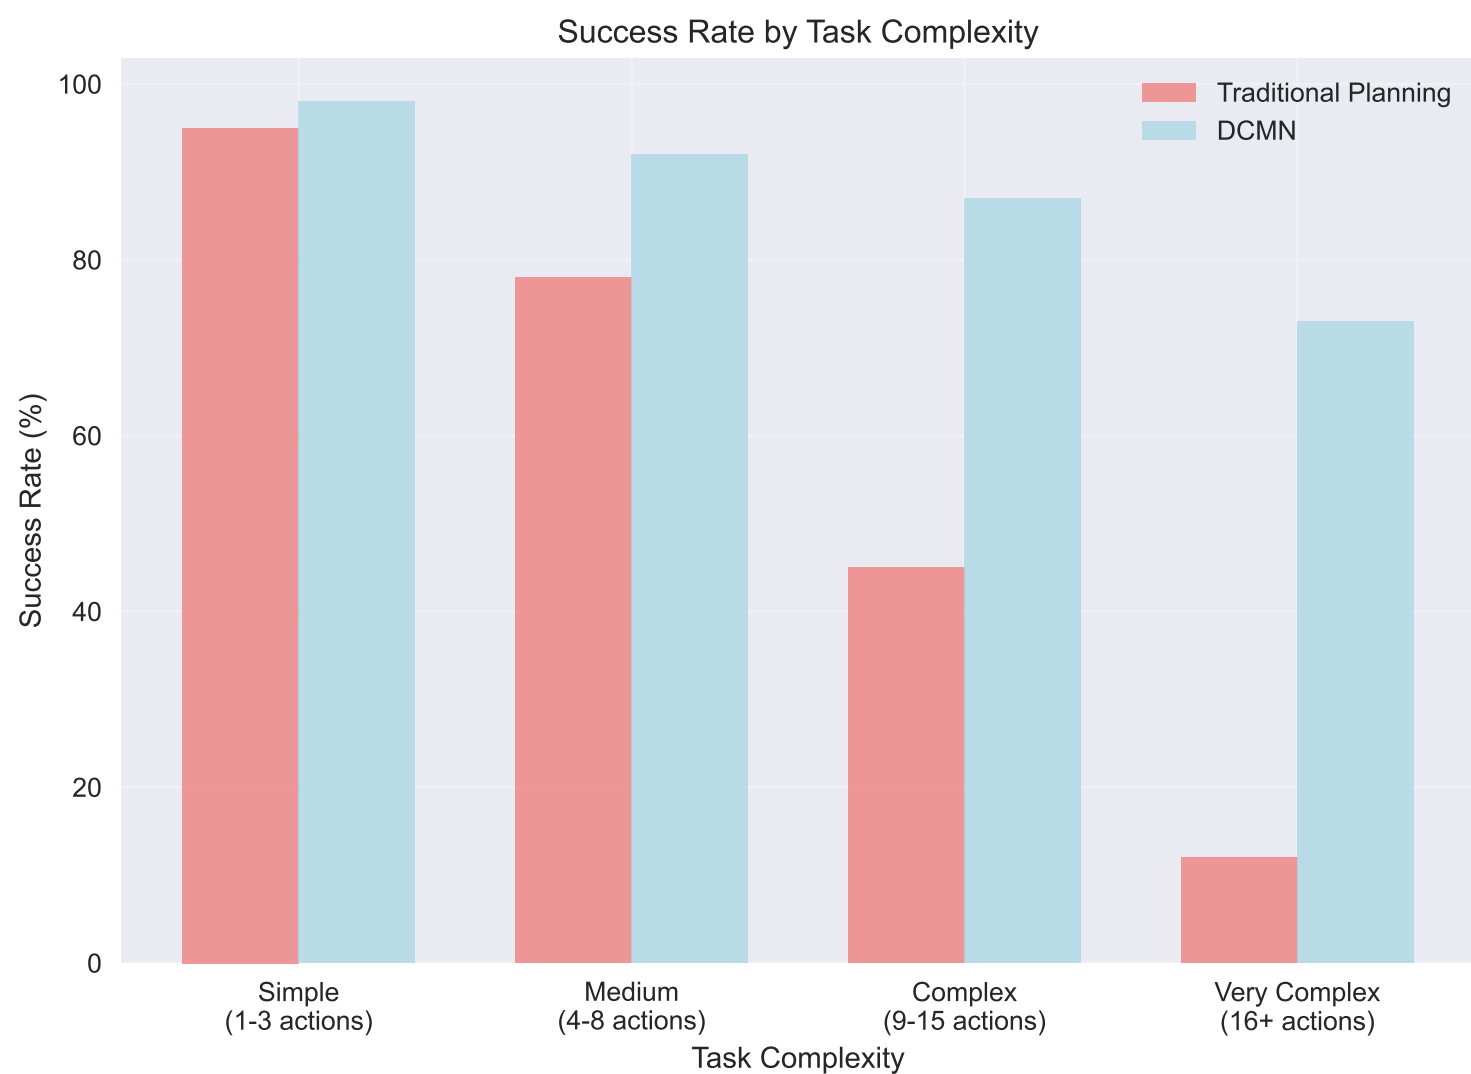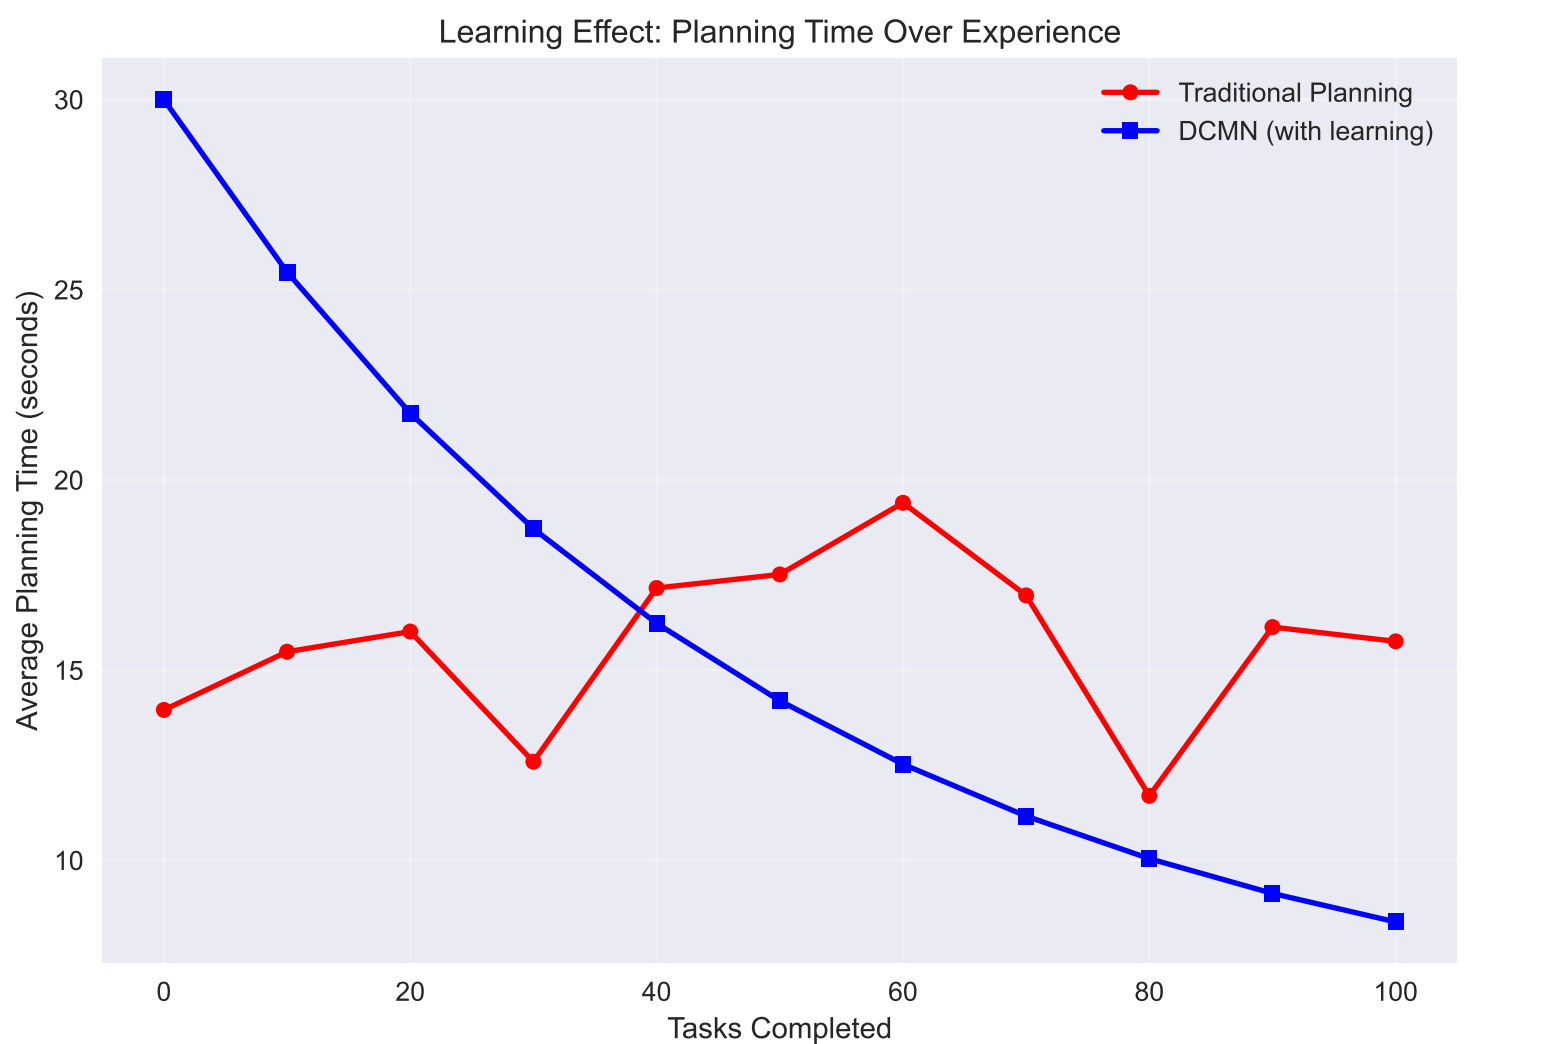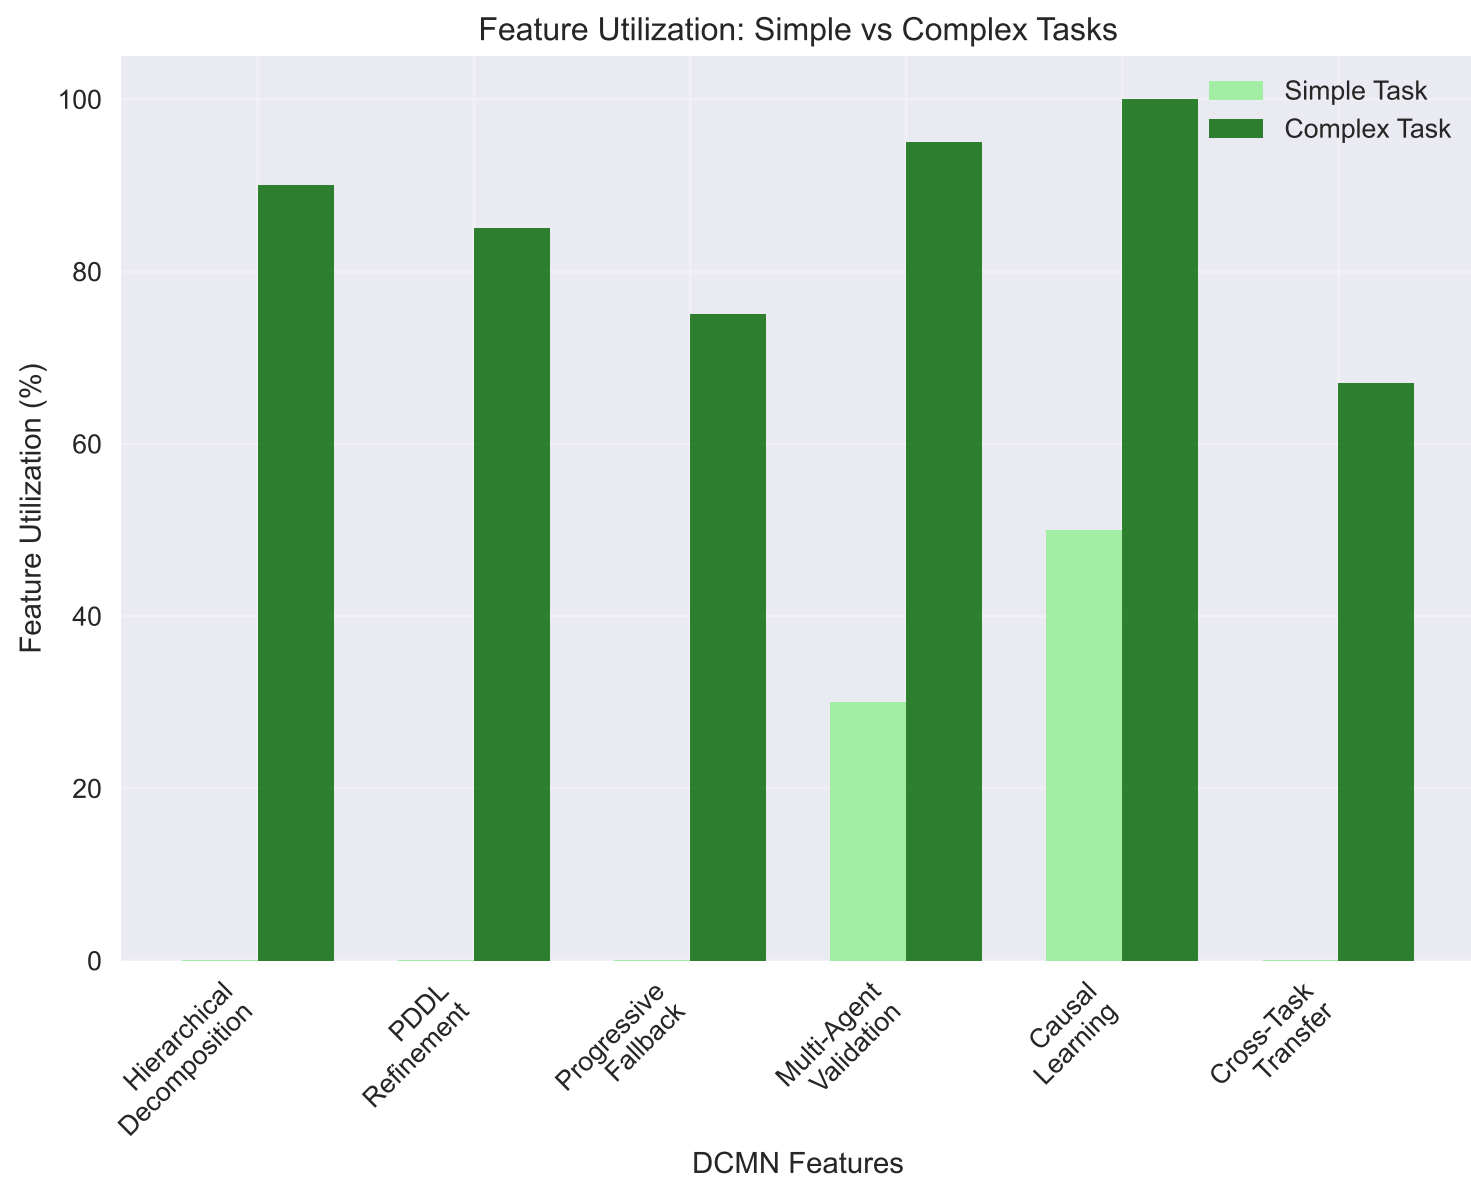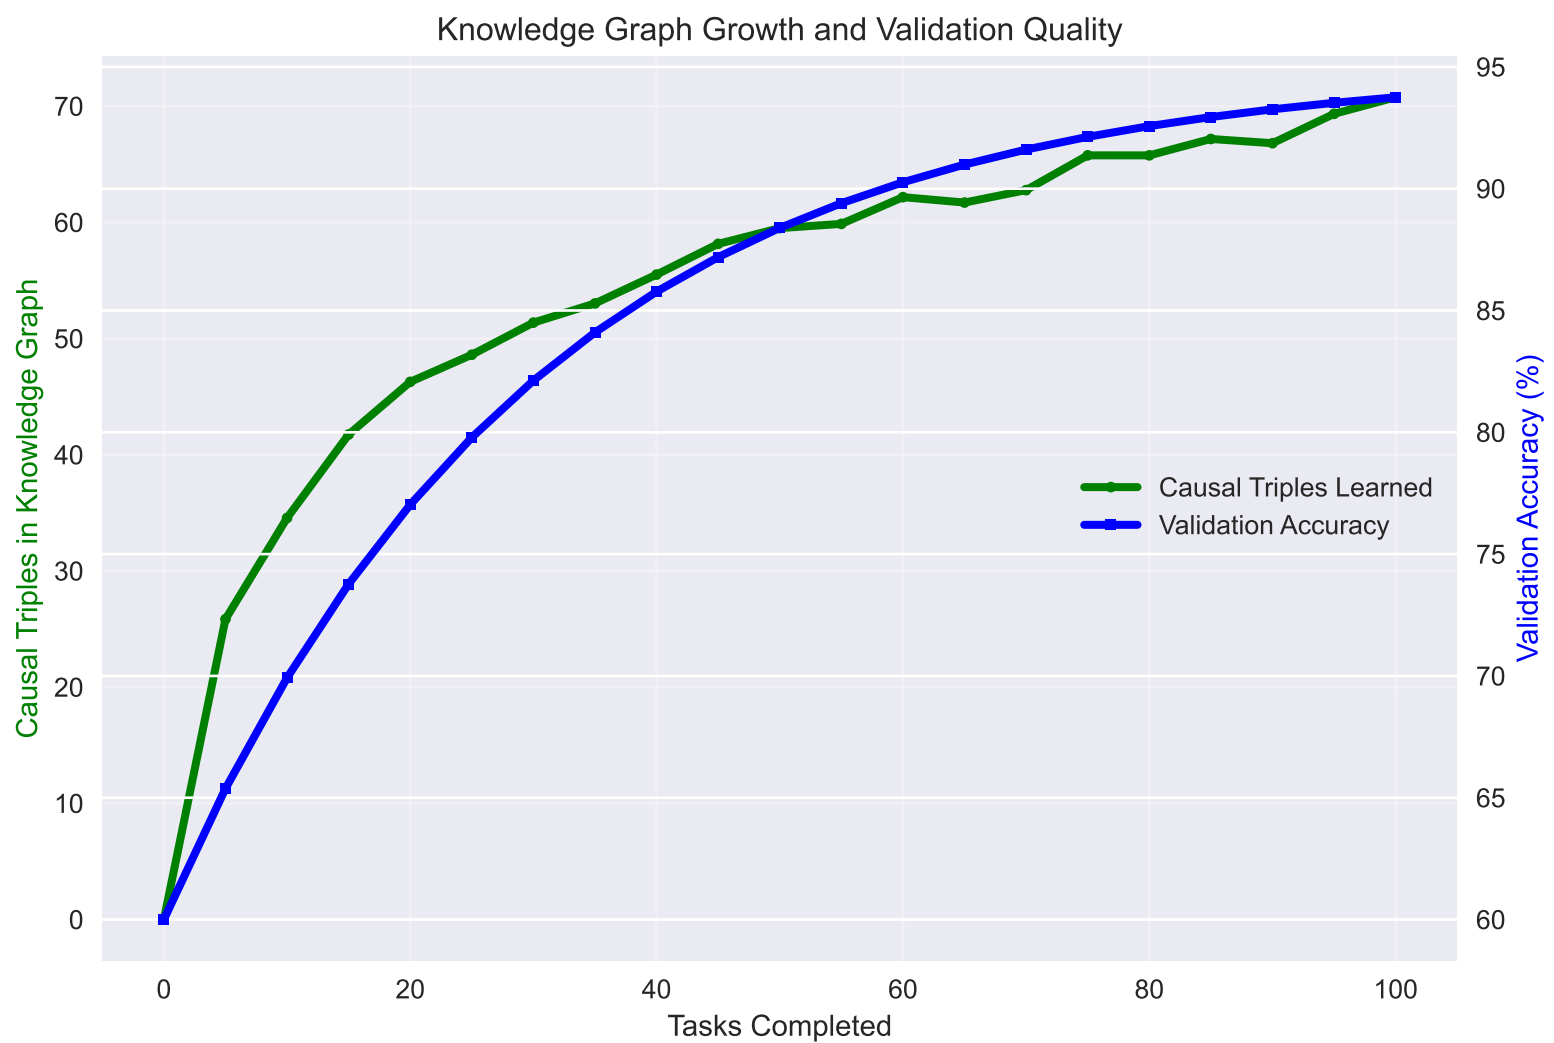

Supplement: supplementary_material [file dcmn_performance_comparison.pdf › research_paper_materials/figures/dcmn_performance_comparison.pdf]
